# Supplementary material
Source: Springer Nature journal article supplement (https://www.springermedizin.de/resource/supplementary/12974_2013_931_MOESM1_ESM.pdf/9600378)

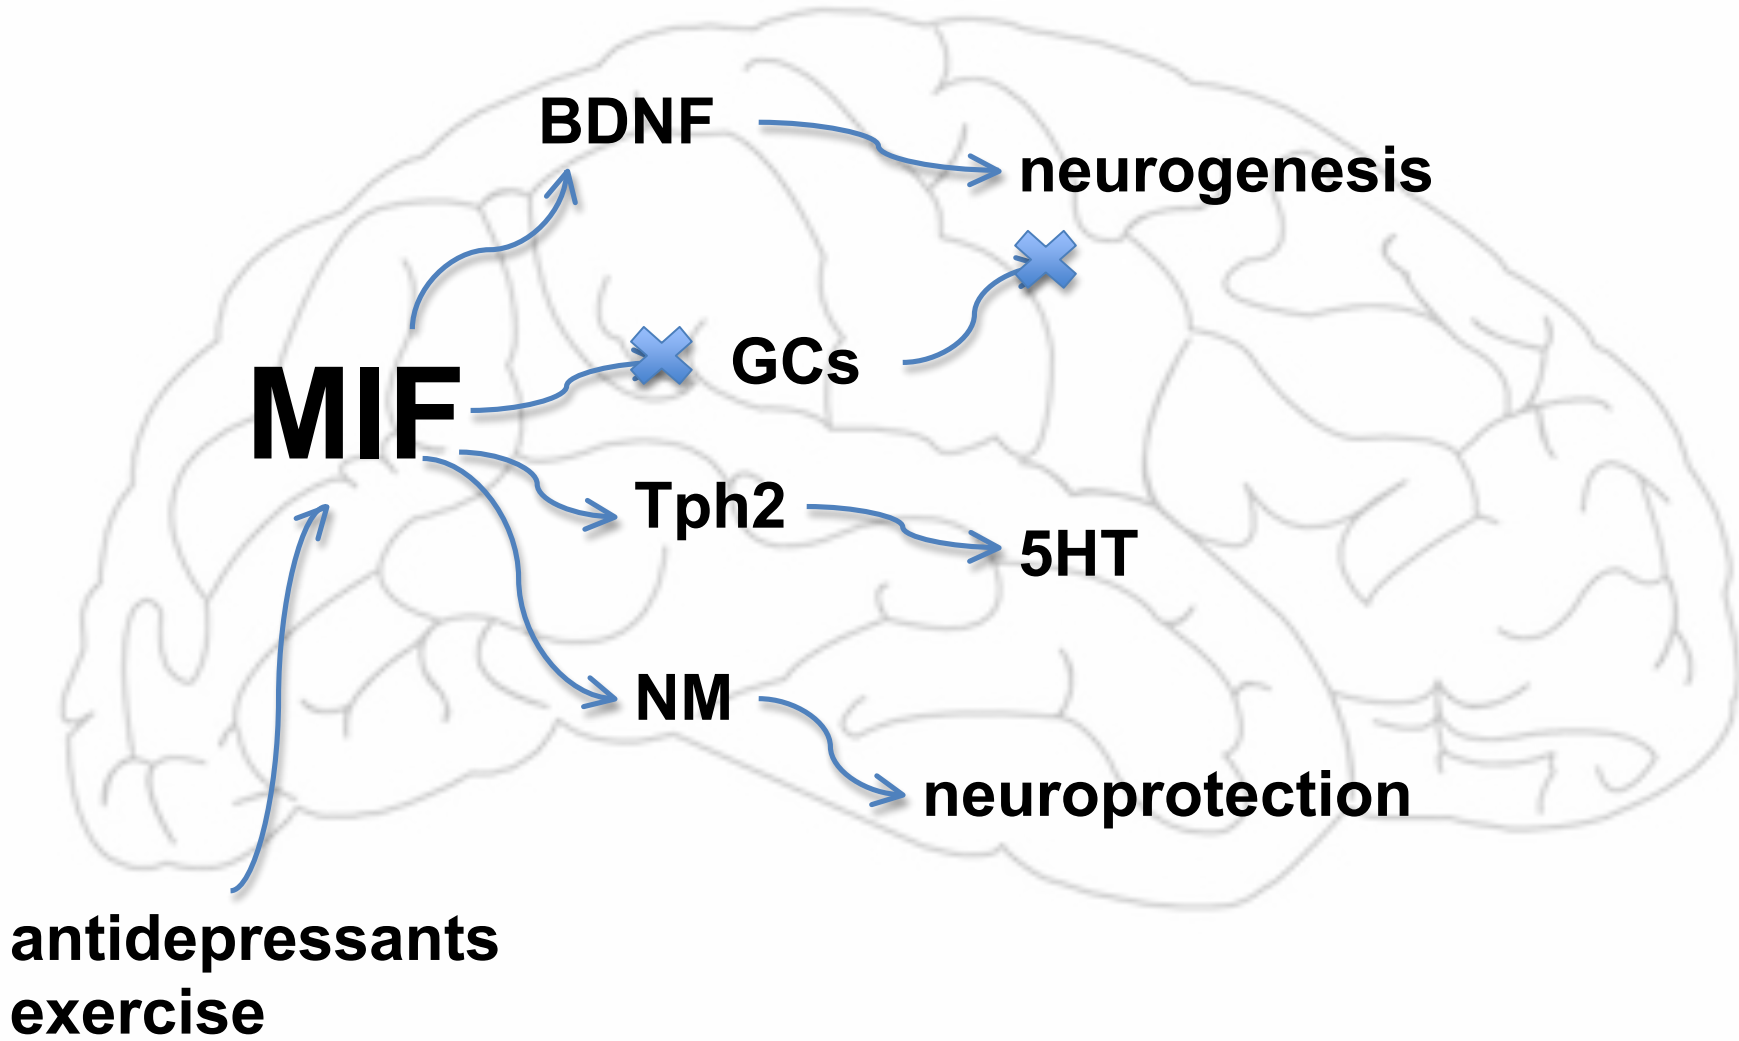

**BDNF**

**neurogenesis**

**MIF**

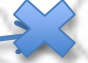

**GCs**

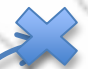

**Tph2**

**5HT**

**NM**

**neuroprotection**

**antidepressants**  
**exercise**

Supplement: MOESM1 [file 9600378]
